# Supplementary material for: Impact of Green Chitosan Nanoparticles Fabricated from Shrimp Processing Waste as a Source of Nano Nitrogen Fertilizers on the Yield Quantity and Quality of Wheat (Triticum aestivum L.) Cultivars
Source: MDPI journal article supplement (doi:10.3390/molecules27175640), 2022-09-01
Supplement: s1 [file s1]

## Supplementary data

### I. Figures

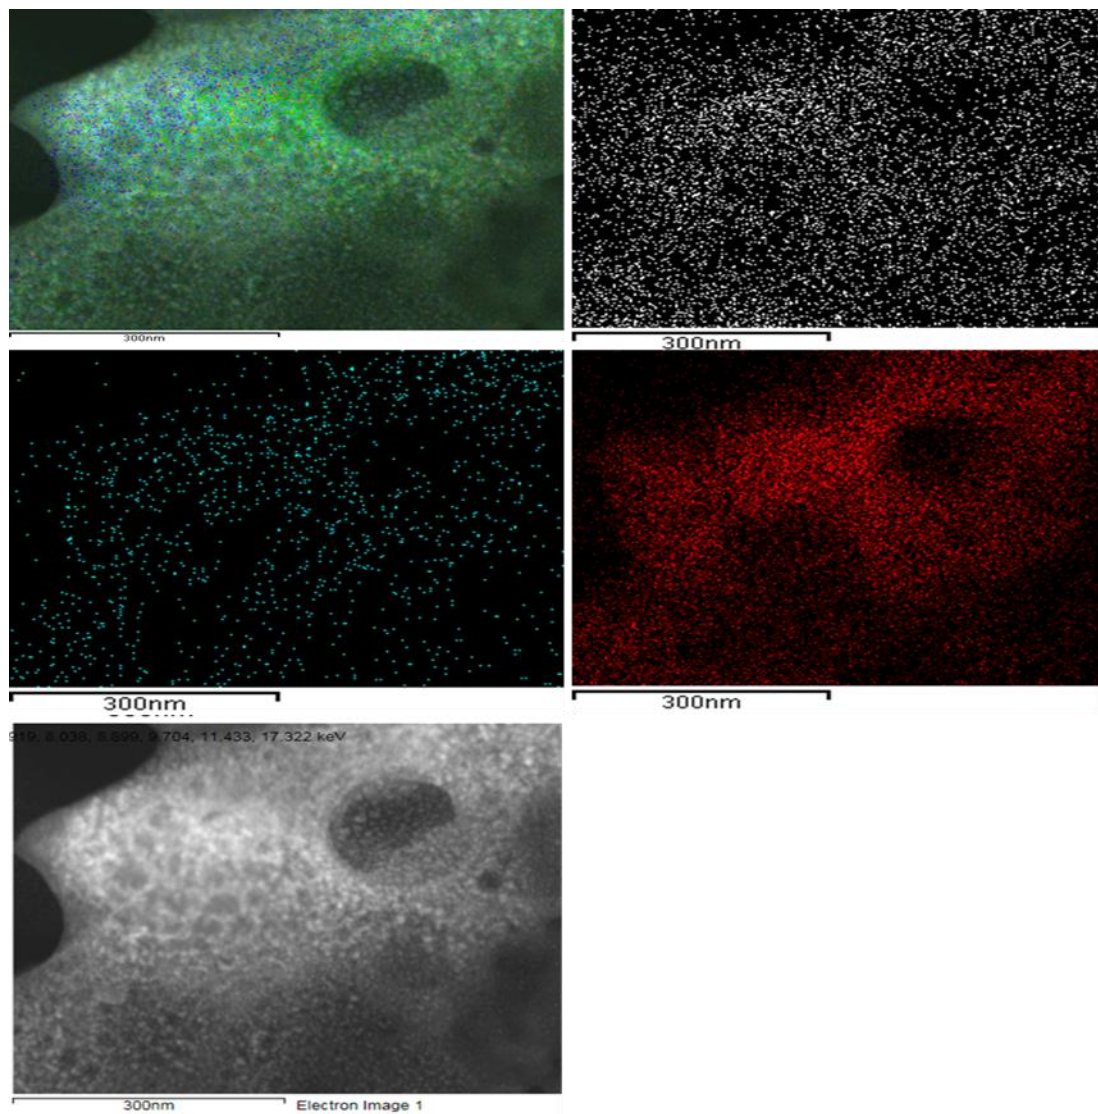

Figure S1. Electron image of the energy dispersive X-ray (EDX) for chitosan nanoparticles.

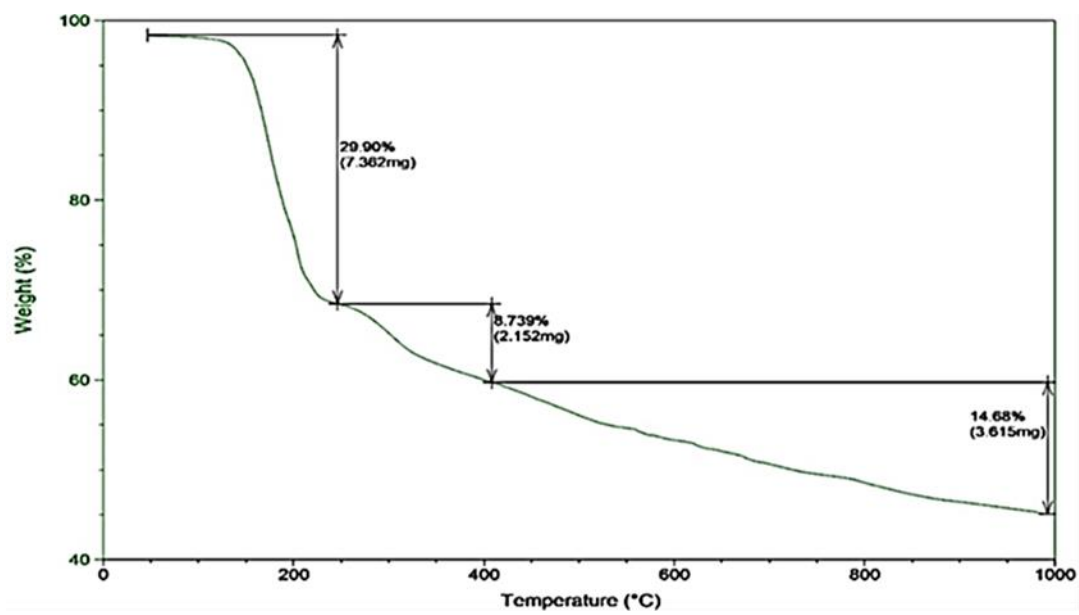

Figure S2. TGA of chitosan nanoparticles.

## II. Tables

**Supplementary Table S1. Physical and chemical properties of the experimental soil units during the growing seasons 2019/2020, 2020-2021.**

| Properties                | First season | First season |
|---------------------------|--------------|--------------|
| <b>Physical analysis:</b> |              |              |
| Course sand %             | 5.90         | 4.82         |
| Find sand %               | 19.60        | 8.05         |
| Silt %                    | 28.20        | 36.60        |
| Clay %                    | 46.30        | 50.53        |
| Texture grade             | Clay         | Clay         |
| <b>Chemical analysis:</b> |              |              |
| pH (1: 2.5)               | 7.8          | 8.0          |
| E.C. (ds/m) (1:20)        | 0.16         | 0.22         |
| CaCO <sub>3</sub> (%)     | 3.14         | 2.13         |
| HCO <sub>3</sub> (meq/L)  | 1.25         | 1.25         |
| Cl <sup>-</sup> (meq/L)   | 0.58         | 0.55         |
| Ca <sup>++</sup> (meq/L)  | 0.8          | 0.9          |
| Na <sup>+</sup> (meq/L)   | 0.77         | 0.83         |
| K <sup>+</sup> (meq/L)    | 0.24         | 0.18         |
| Mg <sup>++</sup> (meq/L)  | 0.2          | 0.2          |
| N available (mg/kg)       | 247          | 172          |
| P available (mg/kg)       | 6.0          | 12           |
| K available (mg/kg)       | 1360         | 1270         |

**Table S2. Impact of nano and mineral nitrogen fertilizers on straw yield kg/ha of two wheat cultivars during 2019/2020 and 2020/2021 seasons.**

| Fertilization Source (F)        | First Season           |                        | Mean (F)                | Second Season              |                            | Mean (F)                |
|---------------------------------|------------------------|------------------------|-------------------------|----------------------------|----------------------------|-------------------------|
|                                 | Cultivar (C)           |                        |                         | Cultivar (C)               |                            |                         |
|                                 | Gemaiza-11             | Misr-1                 |                         | Gemaiza-11                 | Misr-1                     |                         |
| Untreat-control (without N) Mn- | 9587±312               | 10565±395              | 10076±387 <sup>F</sup>  | 11976±380 <sup>f</sup>     | 12800±322 <sup>ef</sup>    | 12388±375 <sup>D</sup>  |
| N (120 kg /ha)                  | 15251±356              | 13753±364              | 14502±349 <sup>DE</sup> | 12812±323 <sup>ef</sup>    | 14787±436 <sup>cdef</sup>  | 13800±382 <sup>CD</sup> |
| Mn-N (240 kg /ha)               | 15544±491              | 15086±342              | 15315±303 <sup>CD</sup> | 12844±306 <sup>ef</sup>    | 13524±311 <sup>def</sup>   | 13184±366 <sup>D</sup>  |
| Nan-N (7L/ha)                   | 13778±428              | 13537±289              | 13657±259 <sup>E</sup>  | 15867±339 <sup>abcde</sup> | 15315±358 <sup>bcde</sup>  | 15591±354 <sup>BC</sup> |
| Nan-N (14L/ha)                  | 13817±325              | 13309±355              | 13563±369 <sup>E</sup>  | 16267±343 <sup>abcd</sup>  | 15683±367 <sup>abcde</sup> | 15975±323 <sup>BC</sup> |
| Mn-N 120kg/ha + Nan-N 7L/ha     | 17499±366              | 15455±398              | 16477±343 <sup>C</sup>  | 15849±278 <sup>abcde</sup> | 13906±391 <sup>cdef</sup>  | 14878±304 <sup>C</sup>  |
| Mn-N 120kg/ha + Nan-N 14L/ha    | 18464±306              | 17145±412              | 17804±429 <sup>B</sup>  | 17893±352 <sup>abc</sup>   | 16858±382 <sup>abc</sup>   | 17375±415 <sup>AB</sup> |
| Mn-N 240kg/ha + Nan-N 7L/ha     | 19937±318              | 18045±457              | 18991±416 <sup>B</sup>  | 18401±424 <sup>ab</sup>    | 18921±437 <sup>a</sup>     | 18661±374 <sup>A</sup>  |
| Mn-N 240kg/ha + Nan-N 14L/ha    | 22032±345              | 19442±377              | 20737±308 <sup>A</sup>  | 18585±396 <sup>ab</sup>    | 18261±454 <sup>ab</sup>    | 18423±425 <sup>A</sup>  |
| Mean (C)                        | 16212±307 <sup>A</sup> | 15148±324 <sup>B</sup> |                         | 15611±327                  | 15562±342                  |                         |
| ANOVA                           | df                     |                        |                         |                            |                            |                         |
| Cultivar (C)                    | 1                      | 0.041                  |                         | 0.806                      |                            |                         |

|                      |   |        |        |
|----------------------|---|--------|--------|
| Fertilization Source | 8 | <0.001 | <0.001 |
| (F) F×C              | 8 | 0.450  | 0.049  |

Different uppercase letter indicates significant difference among evaluated cultivars or fertilization source at  $p < 0.05$ , while different lowercase letter indicates significant difference among their interaction.
